# Supplementary material for: Gut metatranscriptome–virome profiling reveals active antimicrobial peptides (AMPs) encoded in plasmids and phages linked to human diseases
Source: Research Square preprint supplement (doi:10.21203/rs.3.rs-7160447/v1), 2025-07-25
Supplement: Supplementary file 2 [file 56f817cb3d1849ce959d2a4f.xlsx]

## Sheet: suppl_table_1
# Supplementary table 1: Read count per sample.
Group	Sample	Rawdata	Quality Filter	rRNA Filter	Host Filter
NW	015	14106070	13850346	5950404	5271895
O	024	13567974	13311981	7091559	6171884
O	074	6016145	5845317	2453464	2284306
O	090	13000000	12173370	11574651	10899069
OMS	146	15849240	15579482	8412946	7851657
OMS	153	6840695	6649361	4072939	3903920
NW	164	5064740	4909620	2996390	2858526
OMS	258	6889401	6745013	4032454	3728347

## Sheet: suppl_table_2
# Supplementary table 2: Trinity assembly stats.
################################
## Counts of transcripts, etc.
################################
Total trinity 'genes': 42135
Total trinity transcripts: 51087
Percent GC: 48.68
########################################
Stats based on ALL transcript contigs:
########################################
Contig N10: 6604
Contig N20: 3900
Contig N30: 2621
Contig N40: 1872
Contig N50: 1372
Median contig length: 348
Average contig: 708.98
Total assembled bases: 36219600
#####################################################
## Stats based on ONLY LONGEST ISOFORM per 'GENE':
#####################################################
Contig N10: 6971
Contig N20: 4163
Contig N30: 2818
Contig N40: 2018
Contig N50: 1473
Median contig length: 338
Average contig: 720.41
Total assembled bases: 30354307

## Sheet: suppl_table_3
# Supplementary table 3: Information of final AMPs.
transcript_id	dna_sequence	predicted_peptide	peptide_length	best.classification
AMP_102902_c0_g1_i1	TAAAAATAATAAAGCCAACGTTATTTTTATAAAATTTCTTTTTCATATGTTGATTGCCGGAAGAGGCAATTAACTCTCCTTCCTTTTAAAAAATAAATTTGAACGTAATATAAAAAGCATCCGCTTAGCCACCGGATGCTTTTTATAAAGTATAAGATCGGAAGAGCGA	MKKKFYKNNVGFIIF	15	Blautia wexlerae
AMP_1091132_c10_g1_i1	TTTTTTTATATCAAAAGTTTGGTGGTTTCATTCCTATTACATATCTTTGTGATAAGAAAAATGAGTTAGCCGCACATGTTCGATTGGGAAACTCATCAGTTTATTTTAATTCCGAGACACAGCTCTTGTCGTCAATGGCGGGCCGCACCCTTCGGGGCATGCTTAGCACGGCGGATTACAAAGATGGCAAAGCACTCAAATCCTGTCATACGGAGTTTGTTCATATCTACGGTGCGGCTTTCTTTACATAGGAGGATATGTCAGAACAGGCATATCCTCTTTTTATGATTAAGATCGGAAGAGA	MNKLRMTGFECFAIFVIRRAKHAPKGAARH	30	Parabacteroides
AMP_127733_c0_g2_i2	ATGACTGGGATAAATGTGCGACACGTCATGTATATAATTACAAACAATGTTTAATTTGTGGAGAAGTAAGCATTTATGAAGTTGAGACGATTGAAATGTCTCACAAATGGGTGAATGGTGCATGTGTATATTGCAACAAAGGTTACGCAAAAGAGATAAATTAACATAGTATCATTACCGGCAAGTTTATAATCAAAAAATAGAAAGCATTGAGAATATTTCATAATTTCTTGAAAGTACTCTCAGTGCTTTCTTTGATAATATGAAAGGAGAAATAAATGCAAAAAAAACAACTTTCTGTATTAGTACTAATTATTTTATGCTTTTTATTAA	DWDKCATRHVYNYKQCLICGEVSIYEVETIEMSHKWVNGACVYCNKGYAKEIN	53	Lachnospiraceae
AMP_129538_c3_g1_i1	TAAAGACCGCTATATAAATTCTTACATAACGGCCTTTCTAACACTGTTCTTCTGTATTCAATTTTTTCTCCTTTTCGATAAATGATTGAATTCATTATGTTCCAACCTAATCGACTTTTGTTACTTAATGTAACTTTTTTGCTGTATATAACAGCTTAACTTTTTTATTCCCTGCCTCGTAATAAATACTTAGAAAGTTACTACTTTTTGTAAATGGTGATAATACTAAGTTTCAGTATGCTTGGATTCTTCACATTCCTTACATCTTCAAAAAGTATGATTACTATTTTCTCTCAATCTATGTATTATATGTGATTCATATTCCATATATACGTCTTGTATATCTCATGAAATATATCAGCTCAATATCATAAACTTTCAAGTTGTATTAATCATAGA…	MIEMMNKLKVT	11	Wansuia hejianensis
AMP_130289_c0_g1_i1	GTTAACGATTAACAAAACAAAAAGAAACATGATCGAATTGATTGGAACAAACGCCGGCCTTGTTTGGAACGCATTGAATGAAGGCGGTAAGATGAGTGTTAAGGCAGTAAAGAAAGCTACTAAGATTAAAGCGGAAAAAGATATGTATGCTGCTTTTGGTTGGTTAGCGAAAGAAGGCAAATTGGCTTTCGAAAACGTCGAGGGTGAATTGTACGTTGCGTTAGTATAAATATAGCGTAGCTGAATCTATTGGAAGGAGGGCTGTTCGGATTTTAGTTTGAACGGCCTTTTGTGAAGTCGGA	MIELIGTNAGLVWNALNEGGKMSVKAVKKATKIKAEKDMYAAFGWLAKEGKLAFENVEGELYVALV	66	Parabacteroides
AMP_131100_c0_g1_i5	TTGACAAGTTTTTGGCATCTTGCAGACAAGAGTAACGGACACATCATTGACTTGAACACAGACTTGCTATGTTGACTAGAATGAGACTGACAATGACGACTAGAACGAGACTAGAATGAGACGAATCATAATGACTAGTTTTGAAACTTAAAAGTAAGACCCAGCACAATACCCAAACTACATATGACATTAGAGAAGCCTCGGACAAATGTCCGAGGCCTTTCTCTATATGTAAGATCGGAAGA	LTSFWHLADKSNGHIIDLNTDLLC	24	Anaerostipes hadrus
AMP_131149_c0_g2_i1	AAGCGATCCGCTGTAAAGGCGTGAATCGCGTTGCTGTTTGCGTAAACGTAGGAAATTTACAGTCTGCGGCAACAAGAGAGTCCTTGTCGGGTCGTACCACGCCTTGACGGGGCAGTACATTTAAGGCAACTACACCTGACGGGCGTGGGCCTCTTGTGTTACGAAGTCAGACGGGTTTCCTACGACCTACGCAGCGTAAGTAACGCAAGCCGCATACCTTTCTTGTAAAGGACAGCGGGGTTCTTCAGAGCCGGGTTCACGTTTCGTCATTCTTTTATGGCATCAGTCGGGTCGCATAACTAAAATTGAAAAAGATATGTTACCTTTGCGGATGAAAACGGCGCCATAGCCGTAACATATTCATAAGGTTAGGACAACCTTTATACCAGCGGTAAACTT…	KKARNAGTAPTVGLASLGLVTALTPVPAHGTKPQA	35	Alistipes
AMP_131740_c0_g1_i1	ACCTGATACCATTAACCGTAGGAAGTGCGCAGTCTTAACGGTGGACAGGCTGTTTGAAGTCAGTAGATGTAATGCAGAACAGGAGGAGTTTTTATGAAGAGTCCTTTAAAGAATCTGAAAAAATATTTTCAGTTAATCATGACTGCTCTTATTTGCTTTGTAATGGGAGTCATTGAAGACAAGAAAAGAATCTGCATAAAAGATACAGATTCTAAAAAAGACAGAACTGTTTTGCGTCCGGATGATAAAAAGAACAACAGAAAAAATAAAATCATTTACTGGAATGAACCACGAATCCAGAATAGAATAAATAGAGCTGTATATTTTAATACGGGGTAATGAAGCCCCGTATGCAAGTCGGAGATCGA	MKSPLKNLKKYFQLIMTALICFVMGVIEDKKRICIKDTDSKKDRTVLRPDDKKNNRKNKIIYWNEPRIQNRINRAVYFNTG	81	Blautia wexlerae
AMP_133076_c0_g4_i1	CGCGGGTCGACAGGGAGTCAGACAACGAAGTGAACATCAGGATGATGACACTTCTGAAGGACACACCAGGATGGTGTTTCAGGGAAAGGCTTCTGGATGAAGCGAAGAGGATGACGCAGGACGCGTTAAAGGACACCTCCAGGATGGAGAATGAGAACCGGTCAGGATGATTCGGTGGGTCAGGAAGGCCAGGGACACTTCAGGATGAAGTATCACATCGGGGTGGTGTGAGCAGGAAGCAATAGTTCAGGATGAACGATTGGCCGCAAGGCCAGAGGAAAAGTTGTCAAGGATGAGCAGGGAGCAACAAAAGTAGCTGGAATGCTGCGAAACGAACCGGGAGCGCTGTGAATACAGTGCTCCCTTTTTAAGTAAGTAA	MRTGQDDSVGQEGQGHFRMKYHIGVV	26	Escherichia coli
AMP_134571_c44_g1_i3	CTCGCAGCCTGAGTGCTGCGCGTTCCGCCCACTCTTGTGTCGTGTGGGGCCGGGGCGTCCTTTAGACACAGCACCTGAACGGACCTAAGCTTTGCGGACCGGCAGGAACTCATGAAGCTACTGAAGCGTTAGCCTGACGACCGGCGTGACGCGGAGGGAATGTTGTAGATCGCCTGCACCCGGAGACACCTACGCTGAACTCTTTTCGGACATGGGTTCGACTCCCATCGCCTCCACCAATATGTAAGATCGGAAGAGCA	MGSTPIASTNM	11	Caudoviricetes sp.
AMP_134643_c0_g1_i1	TAATCATAAAAGTCCGTTCCTAAGGAGCGGACTTTTTTATTTGTAAGTGTGTGATTATCCGAGTCTCTTGTTTATAACGATATGACCGATATAACCCAGAATAATGACTCCTAAACCGGTAAGAAGAATAGTATTTGACAATCCTCCGTTAATTGCCGGTACAGCCAAAATGATAACACCGATAAGGAGTACGATTACCCCCAGATTTTTCAATAATTCGTTCATGGTGATAGATATTTTATATATTATTTTTTTTCTCCG	RRKKIIYKISITMNELLKNLGVIVLLIGVIILAVPAINGGLSNTILLTGLGVIILGYIGHIVINKRLG	68	Parabacteroides
AMP_135950_c1_g1_i1	TTTATTCTGTGGGAACTTCCATTTGCCATACCACCAACATATTGACTATTTATAGATTCTGAATTGTCCAACGGTTTAAGCCTCCTTCCTTTCTATTTCGTTCGTCCCTTTCTCGTCAGGACTTCTATCGATGATTCCTAAGGAATTATTCTATCAAATCTTCTTATACGAATTTCGATTTAACCTTTTGGGTTATTTTAGGTTATTCTATCTTAATCTAAAATTTGTTGATTTAATTTTCGATTTAATCTTTTCATTAAATTTTTTTACTGAACTTTTTTGGTTCTTCTTTATCATTTAATTTTTTTGATCATATCTTATATTAAATCTTTTTTGATTTGATATTTTGTTTTCCTTTGGATT	SKGKQNIKSKKI	12	Dorea formicigenerans
AMP_136118_c0_g1_i1	TAGTAGTAAAAGAGAAAACAAAAGGTTTTTAGGAATAACCAGTTCTCCAAACGGGAGAACATAAAAAAGATGTAATTATGAAAAGAACAAATGACACAATCGAGATGTTGCAGTATCAGTTAAGAAGATACAAAGCAATGAGAAAGGGAGCTGCTTGCCAATCTTTGCAATACAAGCTTCAGAAATTAATGAGCCAACAGGCTAATGCCTGATGAGCTCTACCATAAAGAACACAAGTATATAATTTTATAATATAAGTAAAAGGATATGATTTTTATCATATCCT	MKRTNDTIEMLQYQLRRYKAMRKGAACQSLQYKLQKLMSQQANA	44	Phocaeicola
AMP_136312_c3_g1_i18	TTTGAAAGGCACTGTCTGCGAATGGTCAGCGTCCTTCCGGCATGAGATCAAAAAGAATGACCGCAGCTTGTCAGGGCTTGGGCGGTCATTTCTTTTTACTATTCGATATGGTCCATGTAATCTGAAACGTGACAAAAATCGCTCCGCCGATAATGGCGAGCAACTGAAGCACTTCGCTCAGCGTCATAGCACATCCCCCCTTTCGCACCATGCGTCAGGGGATAGCAAAAAGTTCACCTCCCCGGCGCAGGGCCGGAAGGGCGTGACCACCTACATTGCAGACAGTACCTTGCTGCATCGGCAGCGTCATAGCACATCCCAG	LGCAMTLPMQQGTVCNVGGHALPALRRGGELFAIP	35	Faecalibacterium prausnitzii
AMP_136668_c3_g2_i2	GCACTTGGACTATTAGCCTTTCGCTCTATCTGTCGCAGTTAGACGTGTTCTTACATGGCATTAGCGAGGCAGCCTACGCCGTGCTGAGTATGGCGGAGTCACATGATGACAAAGCAATACAAAGCGGGCATTGGGTGGGAAAGATAGTCCAGACATAATGAAGGCGTTTACTTGACGCTGTGTTTGAGACGGTCTGTAATCTAGCAAGTCACAGAAATGTTTGGTCTTGAACGTAGCAACGGTAGATGTCCCGGGTGTGATTATATCACTCCTGCGGAGACCTTGTAAGCACGAATTGTACCTTTTCGGGTGCAATAAAATTGTTTATATAGGTCTCCCAAAAATGATTAAGATCGGAAGAGCGTA	MPALYCFVIM	10	Bacteroides
AMP_136903_c2_g1_i6	AAAAAAAATGATAAACCAATGAAAAAAGTATTTGTGTTATTTACCGTTGTTATGCTAATGGCGGTAATGGCTTGGGAAAAGCAATCCGGAAAGCCGGTAGAGAGTGAGTTTCTTTTAGATAATGTGGAAGCATTGGCTGCAGGAGAATCCGGGTATGATACATGTCTGGGTAGTGGGAATGTGACTTGCAGTACCGGAGAAAAAGTAGAGTGCGTAATTAGACCTTTTGGCTTGGATTAATCAATGAGATACCTTTGTCTATTACTATGTGTTTTTGCTCTTTTTCCCTCCTGCAAGGAATCAGAAAAAGATAAAATCGCTCGTTTGGTTGAGGAATGGGAAGGGAAAGAAATTCTCTTTCCTACCCATTCCATCTTTAATA	KKNDKPMKKVFVLFTVVMLMAVMAWEKQSGKPVESEFLLDNVEALAAGESGYDTCLGSGNVTCSTGEKVECVIRPFGLD	79	Phocaeicola
AMP_136922_c1_g3_i3	TACTTAAAACGACCCTGTCCCTGTGTGTTCATCCACAAGGACAGAGTCGAAAAATTCGAATCTGCGGTGCCACCTTGCTTGCCTTGCTCGCTTTCCTCTTGAAAGCCGCAAAGCCCCTCACGGAGAGCCAACACTCCCCTGCCCTGTAACGGAGGCTTCCGTCCCAAGCTACTGGAGGCTCTGCCTCGTTTGCCCGGCCCTCGGCGGCCCACGAATCTCTGCCCCGCTCTCGCCCGTTTTCACTGTCCGGGCTCACTGAAGATGCGCTTTGCAGGTTCTCTTCCGCCTCATTGGTTTT	MNTQGQGRFK	10	Faecalibacterium prausnitzii
AMP_137096_c2_g1_i1	GTCTGACCCGCGCCTTCCCCGAGCGTGCTAAGGAGCTGTTCGCTCGCAACCAGGAGGTTGCAAACGACCGCTACGAGCACCTGACCCGTCTGGTCGAGCTGTACAAGTAAGCTGTTTTTAAGCAGCGGCAGAGACACCAAATGAACCAGCGGCCCCTGCTCTTTCCCGTGTGAAGAGCGGCAGCCCCGCATCGGCGGTTACTGCGCAATGCAGCGGTGCGGAACTGTGGAATTTGCCTTTGCCGTGCACAGAACAGGCTGAACGTTTTGCCCTGTACCTGACAGAACGGTCGAAAAACCTGATTTCATTCCCCGCCTTTTGCGCAGGGGCTTGAGATACCAAAGCGCCCGCGAGGGCCCTTGAGAGCACACCCCGCGTGTGTCAGGAGAATAAGGTCTG…	LTRAFPERAKELFARNQEVANDRYEHLTRLVELYK	35	Faecalibacterium prausnitzii
AMP_137096_c3_g3_i1	ATTACATATACAACAAGGCCCCCGTCTGGCGCTTGCGGCGACGCCAGAGGGGGTCTTGCTGTTTGGGGTATTGCTTTGGTGTGAGGAGGAATCATGTGCAAGGGGCGGTTGCGGCCCCGCACCCTTGTGAGCTATAGTATACCCGAATTACCGGCCAAAATCATGTCTTTCCTGTGAAAGATTTGTTAATCGGCCTGTGAAATTTTTGGAGGCGGGAGCTGTCACTGCCCGGTGGATACATCATATACGCCAGTCGTCAGGAAGGGCTC	EPFLTTGVYDVSTGQ	15	Faecalibacterium prausnitzii
AMP_137133_c9_g1_i1	TAATCATAAAACCGCAGCGCCAACAGGCGCTGCGGCTCCATGTTTTGTTGTGTTCTCAATGCAACTTGCGTTTTTGGAAGCATTTGGGGTATACACCCCGCTTTAAAACTGCATGGGTCTTGGTTCCTTTCCCGTATTTCCGAAACACAGGCTTCTGTATCTCTTACTTTTGAAAAAGTTCCCGAGAACGCTTGCTTAGTGCATTGGTTCCAATACCTTTCGTCGTATTTATTTTGTTTTACCAGATCGTTTGCTTGGTTGAAACCGTATTCCTTGGAAAGAATTCGCTTTGCTTCCGGAATGCCGTCTTTTTAAAAGGCGCCTTTCGTAGGATCATTGCTGTTTCTTTTGCCGGGATCTCAAAACCTGCATAGAGCTCTTTCTTTACAAAGCCGCTTT…	MGLTPFLLSTSA	12	Ruthenibacterium lactatiformans
AMP_137350_c1_g1_i5	TACATATGAAAAAGCGCGGGAATCTGTACCTGTTACTCATCCTGCACTTTGAGGCCTTCGCATTGCCCACCCTGTCCGAACGAGCAACGCAGAAGCCCACGCCGATATGTACAACTTGAATACCTCTTTGACCAGCAAAGATGAAACAAGAACATTAACATATCGCGCAGACACCTACTGTTGCTTTGTTTGTGGCAGGGTTAGAAATTTGCGAAGTTTCAAAGTGCCAAGAACAAAACGCCAAGTAAACGTCTTTTCTATATATATGTATTTTCCACTCTCCCATACCCCCCTTACGGAAGTATCAGCATGGAAAAC	VFHADTSVRGVWESGKYIYIEKTFTWRFVLGTLKLRKFLTLPQTKQQ	47	Phocaeicola vulgatus
AMP_137631_c5_g1_i2	TAATCATAAAAAGGAGTAAATAACGTATTGTCCGGAGAGGTGCAACGAACACCCACGATTTTTATGATTTCGGTCGGCTGGGGAATTGGTTGGGGTATAAGGATTGTTGAAACCGACCGGATACAATAAAAGCGTGAGTGCTGTTGTACCATTATCTAAACTTAAGGCTTAGCAATACCCTTCACCAGATAATGATAAACAACAGACACCCACGCCAAACGTTTTATATAACAAATCTCTAATCGATATGTTGATATACGATCATCTACGTGGAGTATCTGTTGTATCATTTCCCGGTGCATGAAATTTGCTAAGTTTCGATTTGGGAAACAATACGTTATTTACTCCATGAAGGAATAAAAACCGCCTTCGCCTGTTTCATCACGCTGATGGGCAGAA…	PIPKKTYIFVTRFLPISVMKQAKAVFIPSWSK	32	Bacteroides
AMP_138200_c2_g1_i1	TAAAAAATAAGGGGCTGTACACATGCGTCAGCTCCTTGTTTTTAAGGGGATATTCGACTTTTAGCCCCCCAAAAGATCAATATTGTTATGTACAACCGTCCAACCTGCGGGTAAAGTGCGCAACTCGGACCTGGACAGCAAGCTGAAAAGAGGCACAAGTATGTAGGCAACCCTGTTATAGCACCGGAATCTGCTGTGTCGCATGAATCAACCGTAGTCCCCGTGAAAGGCATGGCTATACCGCCAAGGGCTGTGGATGAAGTCGCAATGCGGAAAGCCGTCCTTTCCCAGGCAGTTCTCAGGAAGTCTTAAGAAAGAGGGGATAAACATCTGATACGGACAACTCGCAATACGATACGCAACGATGAAAGTGGTGAACAAATCTGGCACTAACGGATG…	MRIITSYCWKIIYKSGMRVRVLTNNSARFIGGCQTSTGTCTTRGYKFGPEVWMVFRTPDQRTLADSPEPGKP	72	Bacteroidaceae
AMP_138312_c4_g6_i3	AAAAAAAGAACATTTAAAACATAAAACAGAGACAATTATGAAAAAGTACGTTTGCACAGTATGTGGTTGGGTTTATGACCCGGCAGAAGGAGATCCTGAAGGTGGAATCGCTCCGGGAACAGCATTTGAAGATATTCCAGATGATTGGGTTTGCCCTCTTTGCGGAGTAGGTAAAGATGATTTCGAAGTTCAAGAAGATTGATCCTACCTTATAACCGGATATCATATAAAGCGGAGGAATTTCTTTTGTATGATATATCAGATAGCGCGACTAATTATTATTTAGTTGCGCTTTTTTAA	KKEHLKHKTETIMKKYVCTVCGWVYDPAEGDPEGGIAPGTAFEDIPDDWVCPLCGVGKDDFEVQED	66	Phocaeicola vulgatus
AMP_138543_c2_g6_i1	GGAACGATCACCGTGATCGCCCGCTGAAACCCGTTTTGCAAAAGAGGCTAAAGAAACGGACAGACTGCGGTGGAAAACACCTAGGCTGTTCTTTGGAAACGGATCAGGGATTGCAGTGCGGACTCAGTGGCAATCGGGTAGCGCATCCGGCAACGGTGTGCCTCGGAACTGAAAGGGGAACCGCCTCCATCGGCAACGAGGGGTGTTCCGTGGGGAAAGCAGACCCGCACCTAAGCCGCAAGATTTACCTGTTCCGTTGCCGCTGCCTTAGCAATAA	IAKAAATEQVNLAA	14	Dysosmobacter sp.
AMP_138674_c4_g1_i1	AAAGGAAAAACAAAGAGCCAAACAAAAGCAGACAACAGGGTTCGCTGAAACGGTCAACGGTCTGACGATACAGTAACGATTTCAGAGGGCACGGCAAAGTGAAGTGAGGCGAGAGGTTTTCCTTATATATCACAGGCAGATCGGTGGACACAGCATATACCCGACACTAGGTACACTACAGTTCAGCAGGCGGGCAGGCTCATCGGATACCTAATAAGATATGAAAGGAGCGAGTCCAATGGACGCATCAGAGATCCAGGAGAGTATCCATAGGCTCGGCAATTTCTTAAAGTAAAAAAGGATCAAGACTCAGACGAATGAGCTGACAGGAATCCAGACATATATGATTTACACAGGAAGAAATTGCAGAGCCTCATGGATTAATCACAGCACAGAGTT…	KEKQRAKQKQTTGFAETVNGLTIQ	24	Ruminococcus bicirculans
AMP_138681_c7_g1_i1	GGGGGTGTGGAGGCAGGAATAGCGGGCGGCGGCGCCTGACCGCCATAAAACGGGCACCTTATAAATTAAAGAACAACAACGAAACTGTTCTTCTCGCTGCTTAATTAGCGAGCGTTCCCGCCGGGAGGACCACGGCCCGGCAGCGGAGCGTCGATGAGTGGTGAACGTGCGCACGCTAAGCTTTGCGCGTGCCATGCATCATGAAGCTACCGGACTGACAGGCTTGCCGGTTTGCCTGTCCTGAAGGGAACAGGGGCGTACAGCGTCCCGAAAAAACCCGCTGCGCCCGGAGAAGTTCCTGTCAAAGCGCTTTCGGACGAGGGTTCAACTCCCTCCATCTCCACCAAAGTCGGAGATCGGAAGAGCGTCAAGTCGG	GCGGRNSGRRRLTAIKRAPYKLKNNNETVLLAA	33	Caudovirales
AMP_139116_c3_g1_i4	CTCGCTCCCCTGAGCGCGCTGCTGCTCATCCTGTAAGTTTCCCCTGCGGCTTTTCGGGAACTTCTATCTTTCGTCAAACCGGCGCACACCGCGCTGTTTTGGGATATTGTTCGTAAAGGAGTGCTACTATGGAAAACATCATGATGCTGCCCGCTTCCTACTGCGTGATGAACGAAGAGGAAATGACCTATACCACCGGTGGTGCCAGTGCTATTCAGGCTATCGCTGCATGGGTCTTCCCTCCTTATGCATGGCTTGCGGGCGTCACGGCTATCCGTGATTACCGCAAGAAGAACCCTAATACTTGGACTCAGGACGGTCTGGACTATTTCGCAAATGATATGGGGAAGAGTGTATCTAATTTCCTCTATGACCTTGCGTGTGCCAGTTGGGTTCTGG…	MENIMMLPASYCVMNEEEMTYTTGGASAIQAIAAWVFPPYAWLAGVTAIRDYRKKNPNTWTQDGLDYFANDMGKSVSNFLYDLACASWVLGTSATG	96	Faecalibacterium prausnitzii
AMP_139333_c4_g6_i1	TTCATTGGAGACGGACGGGCTGATTGTCAGGAAAGTCTATGCGGAAGTTCCTCCCCGTGTGGAGTATAACCTTACAGAAATCGGATGTAGCCTGATGCCGCATATTGAATCTTTGGTAGGATGGGCATTGGAGCATATGAATGATATTTTGAATCGGCGCAGTCTGCAGAACTGATGGGTCGATATGCAAAGAGGGTGTGTCGAAACTGGTATTCACCACAGATTACACAGATTTGCACAGATAAGCATCTTTGATTATCAGTAGATTAAGCTCATTCTGTGTTAATCCGTGTAATCTGTGGTGAATTTTGACACACCCCTTCAGAAGTTTCCAAGTGCTTGTTTTATTTCTTAGCATCGGCAAAATTGTGAACCTTGTTTTTCAGATTGTCAGCTTTC…	MKCKDSNFWIGLGIGSVAGALAYHFSRTEKAKKLEDAICRAIHKANGEAKEFINTAEEEALHVGTKVADKMAHEAHEAAEKADNLKNKVHNFADAKK	97	Bacteroides uniformis
AMP_139720_c6_g2_i1	TAATATTTAGGTCTGTGGTTGAAAGTCCAAGCCAGTCGCAGGCAAAGGGATCCACGTAAGTCAACACTAAAAATGGGGTTGATGATCATGGTGCGGCTTAGAAGTAAGACCTACCGGTATAAAATCGAGAGAGCTAGTAGTGCGGCAAACCCAAGCGAACCCTCCAGTAGGCGAGTGTGGGGTCAAAAACCAGGTCAGCTAAATATTCAAAAGTACCTTTTTAGGTGCTTTTA	KAPKKVLLNI	10	Romboutsia
AMP_140586_c3_g1_i1	TGATCTTGAAAAATCCACCGTACTTAATAATATTTTAAATACGATGGATTTTTATGATATCTCATCCAATGGACTATACCTCTTTCTTTCTTCGATTTGTTTTTTATCATTTTTAAATGATGTTAAATTTACGTTCCTGGTGGTTTATCCTCCTTATTCTTTATTAGAATCTTTTCAGTTTAAATTGTCCTCTGCATTGGACTTTACCTCTTTCTTTAGATTTTAAA	DLEKSTVLNNILNTMDFYDISSNGLYLFLSSICFLSFLNDVKFTFLVVYPPYSLLESFQFKLSSALDFTSFFRF	74	Dorea longicatena
AMP_140874_c2_g1_i5	TAAAAAGGCTGCCGTACCCCGCAAAGAGTACGGCAGCCTTGATGGCTTTTTCGACGTCCTTGGACGTGATGCGTTTTACAGCGCAGCCTTGAAGTCGTGATGAGTGGAGTTGTAACGGACAACTGCTTCCATCAGGGTGACAGGCCACAGCAGGACCTTGCCAACCATCTCAGCCGGCTTGACGCATACCGTCTCCATGCTGTCGATGCCGAACAGGATCAAACAAGCGATACCGCAGCCCAGAATGTAGTAATACATAGTCAAACCTCCTATATTTTTCTCACAGGCCCGCAGTGTGCGGAGCCTGAAGCTCGTTGTTACGGGGGCGCTT	SAPVTTSFRLRTLRACEKNIGGLTMYYYILGCGIACLILFGIDSMETVCVKPAEMVGKVLLWPVTLMEAVVRYNSTHHDFKAAL	84	Faecalibacterium prausnitzii
AMP_140874_c2_g1_i6	TTTAAAAAGGCTGCCGTACCCGCAAAGAGTACGGCAGCCTTGATGGCTTTTTCGACGTCCTCAGACGTGATGCGTTTTACAGCGCAGCCTTGAAGTTGTGATGAGTGGAGCTGTAACGGACAACTGCTTCCATCAGGGTGACAGGCCACAGCAGGACCTTGCCAACCATCTCAGCCGGCTTGACGCATACCGTCTCCATGCTGTAGATGCCGAACAGAACCAAACAAGCGATACCGCAGCCCAGAATGTAGTAATACATAGTCAAACCTCCTATATTTTTCTCACAGGCCCGC	RACEKNIGGLTMYYYILGCGIACLVLFGIYSMETVCVKPAEMVGKVLLWPVTLMEAVVRYSSTHHNFKAAL	71	Faecalibacterium prausnitzii
AMP_140952_c1_g1_i1	TATTTAATTTCACAGACTGATCTGTTATTCGCTTTATTGATGCACAAGAACGGCTCTTGTTGTTGTGTTTTTATACGGGGGAAACATCCCGTTTGTGGTGAGCCTCTGTTTTGCCTCTCAGCGAATCCCGACAGTCTGTCCGAACTGTGCGGGTTCCATATCGACCATCGGTCTCGCTCCTTTCTGGTTCAAGTCAGCGGGGTTAGCTCTCGTTTGAGCTTCTGCTGTACTTCTCTTGTTTCT	ETREVQQKLKRELTPLT	17	Faecalibacterium prausnitzii
AMP_141022_c2_g2_i1	TCGGCAAAGGTGCTGTCTGTATCTACAGGTGGTCATGCTCCTTCCGGCAGTGCGCCAGAGGGGCCAAAAATTCTTTTGCTTCCCCTGACGCGCAAAGCGGAAAGGGGGGATGCTTCATGACGTTTGAACAGGTCGTACTGCTGCTCACGCTGCTTGGCGGGGCAATTTACGCCACCTTTGAGATTACATGGAAGATTTCCAACGGCAAAAAGAAATGACCGCCCAAGCCGTCCAAAGCAAGCGGTCATTCTTTTGACTTAACGCCAAGGAGGAGCTGACCATACGGGCAGCACCTTTTCTAAGTATA	GKGAVCIYRWSCSFRQCARGAKNSFASPDAQSGKGGCFMTFEQVVLLLTLLGGAIYATFEITWKISNGKKK	71	Faecalibacterium prausnitzii
AMP_141075_c3_g1_i1	TCGATCTCCGACTTGGAAAAGGACGGTCATCATTTTACTTATATTTCAAATGATGACCGTCCTAAAATTCTTCAGTATTCAATGGTCTTTTCCTCGTTTTTCAAATTGATTTACAATTTAATATTTACGTGGTCTTTATTCAGTTGTTCTATATTCAGTTTTAAGTTTTTATTTAAAATATCTTATCTTATTTCCTGCTCATAAACGATATGATGTTTATCATTCGGTTTATTTAGAAGTTTGATAGATTGAAATTATAATTCACGTTTTATAATTTCTTCTGCAGAAATATCGGATATACTTCTCAGGCTCTGAATCATTATCATAAACAATTTCAAACTTAATTCGGTTAAATCCAAAACCACTTACTGGTTCATATGCTCTCTTATATGTATTATA…	SKEKKNNFIKKGA	13	Blautia obeum
AMP_141378_c0_g1_i1	ACCGAAATCTTCTTTACGATTCGATACTCACCTTACATTGCCGGCTCTATCATTGCATAACCTCTCTTTCTTAAATTATAAGGTAAATCATAAACTTTCTGGTGGTCTGTATCTCCTGCTTTTTTAAATTTTTAAATGGGGTAAATCCTTACTTTCTCATTGGACTGTACCTGACTTTCTTAAAATTTGTTTTTTAGGTGTACCTTTACGTTTTCGGTGGTCCGTACCTTCCTTTCTTGAAAATTACATCTGGAGGGATGCTGCCTTTGAACTTTACGTTAAGTTTCTGGTGGTCTGTACCTCTCTTTCAAGTTCCTTTATTATTGTGTTTCGTTCTTTTCTTTTGTTGGGCGGC	RPTKEKNETQ	10	Sellimonas
AMP_141713_c1_g2_i1	GCAGTATCCTAGTCGATTCTGACCTATCTGAAGGCGGGCCTAAAAATCCGCTGCATGGCACATCGATGAAGTTTCTGGTGTTTTGCTTTGAACGCCCAGTTCGGGGCTGATGCTGGGAGTTAAGGTTTAGGGGCGGTTTCCAACGGCATGGTAACCTTACCCCCTTTTCCGTGGAGGCCTATGACTGTGGCGGCCCATACCTCCTAAGGGAGCAAGTCGTTACGGCATAGGGGAAAACCTGTTTTGCGGTTAGTAATTCACGTCCTCACAAGGGACGTGGTATGAATGCTGTGGGCAGCGTAGCCAGCCTTGAGTGGATATGGCGGATAGACGCCCAAAACTTTTTCGCCGCTCGGCCAGTGGCAAAAAGGCAATGCGTCTTGAAACCATATTTGCAAA…	MADRRPKLFRRSASGKKAMRLETIFAKEDTESSGCLGKLLGCRNWMNRGLQCGLSGNPVTTKQYKSLMGNRFFGDD	76	Pseudoclostridium thermosuccinogenes
AMP_141713_c1_g2_i3	AATTAATAGTGGTGCAGTATCCTAGTCAGTACGGCTCTTCGGAAAGCGGGCCTAAAAATCCGCCAAATGGCACATCGATGAAGTTTCTGGTGTTTTGCTTTGAACGCCCAGTTCGGGGCTGATGCTGGGAGTTAAGGTTTAGGGGCGGTTTCCAACGGCATGGTAACCTTACCCCCTTTTCCGTGGAGGCCTATGACTGTGGCGGCCCATACCTCCTAAGGGAGCAAGTCGTTACGGCATAGGGGAAAACCTGTTTTGCGGTTAGTAATTCACGTCCTCACAAGGGACGTGGTATGAATGCTGTGGGCAGCGTAGCCAGCCTTGAGTGGATATGGCGGATAGACGCCCAAAACTTTTTCGCCGCTCGGCCAGTGGCAAAAAGGCAATGCGTCTTGAAAC…	MADRRPKLFRRSASGKKAMRLETIFAKEDTESSGCLGKLLGCRNWMNRGLQCGLSGNPVTTKQYKSLMGNRFFGDD	76	Pseudoclostridium thermosuccinogenes
AMP_142174_c7_g1_i1	AGAAACCAGAGAAGTACAGCAGAAGCTCAAACGAGAGCTAACCCCGCTGACATGAAGCAGAAAGGAGCGAAGACCGATGGTTGATATGGAACCCGCACTGTGTGCACAGACTGTCGGGGTTCGCTGAGAAGCAAAACAGAGGCTCACCACAAACGGGATGTTTCCCCCGTATAAAAACACAACAACATTGAGCCAGTCTTGAGCATCAAAAATGCGAAAACACGACAACCTGTCGATCAACTAAAACCCCAGCG	RNQRSTAEAQTRANPADMKQKGAKTDG	27	Faecalibacterium prausnitzii
AMP_142178_c2_g1_i3	TGATTTTATATCACAGACTTTTCTGTTATTCGCTTTATTGATGCCCAAGAACGGCTCTTGTTGTTGTGTTTTTATACGGGGGAAGCATCCCGTTTGTGGTGAGCCTCTGTTTTGCTTCTCAGGGAACCCCGACAGTCTGTGCGTACTGTGCGGGTTCCATATCGACCATCGGTCTCGCTCCTTTCTG	QKGARPMVDMEPAQYAQTVGVP	22	Faecalibacterium prausnitzii
AMP_142309_c15_g5_i3	TTGGTGGAGCCGAGGGGAGTCGAACCCCTGTCCGAAAACAGTTCCACGGGACTTTCTCCGGGCGCAGTCAGGTTTCAGAATTCCCGCCCCGCAAAGACACCTGACAGACTTTGCGGTTTGGTAGAGTCATGATGCGTGGGCAGGTCAACTCTTTCCCGCCTCACGGACGCCACATCAACGACGCCTTCCCCGGCCTGTGGCCTCTCCGGTTCAGACGGCTGCTTTAATTAAGCAGCAATAGCAACAGTATTGTTGTTATTTAATTTATAAAATTGCCCGTTTTATGGCGGTCAGGCGCCGCCGCCCGCTTGTCCCGCTTCCCCATCCCCGTCGAAACCTTTACGGCCCCCTATCGTCGAAGCAAAGTCCGCGTACTCCGTTTCCGCCTGCGGTGAAAAC…	EAREQTQFSPQAETEYADFASTIGGRKGFDGDGEAGQAGGGA	42	Myoviridae sp.
AMP_142388_c1_g1_i2	AGACGGTCCGTACAACAGCTTTCTTCATTGGGATCACCTTCGGCGGATCTATTAGAACGCGAGGGATTTATTTCACAGACTGTACTGTTATCCGCTTTATTGAAAGCTCAAGACCGGCTCTCGTTGTTGTGTTTTTATACGGGGGAAACATCGCGTTTGTGGTGAGCCTCTGTTTTGCCTCTCAGCGAATCCCGACAGTCTGTCCGAACTGTGCGGGTTCCATATCGACCATCGGTGTTCGCTCCTTTCTGCTTAAAGGCAGCGGGGTTAGCTCTCATTTGTTGTGTTTTTATAGGGGGGAAACATCCCGTTTGTGGTGAGCCTCTGTTTTTCTTCTCAGCGAACCCCGACAGTCTGTGCGTACTGAGCGGGTTCCATATCGACCATCGGTCTTCGCTC…	ETREVQQKLK	10	Faecalibacterium prausnitzii
AMP_142511_c2_g2_i11	GTGAAAATCAGCAAATTGCAAAACAAACACCCAGTTTCACACCCAAGAATGTAAAGTCGGGTGTTTTTGTTTTATTTAAGATAATACAACCACTACATAATAAAAGAGTAGCGATATTAAAAGAATCCGATGAGAAAAGACTAATATTTATCTATCCATTCACTTTGATTTTTCAGGACTTTACATCGTCCTGAAAGTATTTGTTATTGTATTCCAACGTCAGGAGTGGATTATAATACAAGTTTTTTGTGTGGATAGAATTTCGTTTTGCTTAATGTACGAAAGTACTTATCTATAAACGCATGAAATATTAGCACAATGAATCATTGGAAATCAACTTTGGCCGTGATAGGAATAGGCCAACTCATATCTATTTTAACAAGTACGATTGTTGGCTTC…	ISDLNHKNNGEANNRTC	17	Bacteroides thetaiotaomicron
AMP_142526_c5_g1_i7	AATCTTAAATAAAGGTGGTGTATTTTATGTCAAATATTAGAAGTGAATTTGGTAATCTTAAAGGTCATCAAGTAGAAACTGCAAGGAAAACTCTAAAATTTGAGAATAGGCACTATTATAGAGAAGCCCATGGAATACAAGATGGGATACGTAAGGATAAAAAATTAAAAATGGATAAAAAATATTAATAGTTTTTTAAACTTATGTATATTTTCTAAAATTTAAGGGAACATTATAAACAACAACACAAGATGTTGTTAACTATCATCTAAGGAGGAAATTTACTATGTCAAACAATAATAGAACTGTAGTTCCAGAAGCTAAGGCTGCTTTAAACCAAATGAAGTTAGAAATAGCTAACGAAATAGGATTAGCAAACTACGATACTGTTGACAAAGG…	ILNKGGVFYVKY	12	Romboutsia ilealis
AMP_142562_c4_g9_i3	TTATGATCTTACATATTGGTGGAGGTGAGGAGAATCGAACTCCTGTCCGAAAAAGCGACAGCCAAGCTTTCTCCGAGCGCAGTTCGCGATTTAACATTCCCTCTTCCCAGCGCCCACGAACGGGCTCAGGGATTCAGTAGCTTCATCATGTGTTCATGCGGCAAAGCTTAGGCATGAACATGGCCCGCTAAATGACGCCGGATTCCGGTGCAGCGGGATCACCGGGCCGACGCGCAGCCTAATTA	MFMPKLCRMNT	11	Ruminococcus bicirculans
AMP_142590_c2_g1_i1	GTGCTCTTCCGATCTACAGCAGAAGCTCAAATGAGAGCTAACCCCGCTGACTTTAAGCAGAAAGGAGCGAAGACCGATGGTCGATATGGAACCCGCACAGTTCGGACAGACTGTCGGGATTCGCTGTGAAGCAAAACAGAGGCTCTCCACAAACGGGATGTTTCCCCCGAATAACAAAACAAATCAAAGAGCCGGTCATCAGCATCAAAAATCAGAAACCAGTACAGACAGTCACAATAAGTCCCCAGGCAAATCGAATAAATCCGCCACAGATGTCCTCCAATC	MLMTGSLICFVIRGKHPVCGEPLFCFTANPDSLSELCGFHIDHRSSLLSA	50	Faecalibacterium prausnitzii
AMP_142862_c0_g1_i1	AGAAACCAGAGAAGTACAGCAGAAGCTCAAATGAGAGCTACCCCCGCTGACTTTAAGCAGAAAGGAGCGAGACCGATGGTCGATATGGAACCCGCACAGATTGGACAGGCTGTCGGGAATCGCTGAGAAGCAAAATAGAGGCTCACCACAGACGGGATGTTTCCCCCGTATAAAAACACAACAAAATTGAGCCAGTCTTGAGCATCAAAAATGCGAAAACACGACAACCTGTCGATCAACTAAAACCCCAGCGATTCAAATAGATCCGCCGGAGATGGTTCTTATGAAAGTACCTTTTGTACGGAGAAGCTTATTTGAATAGCAAAAAAGGAGTTCTACCAATGTACTAAGCAGTTTGTCCCTTGGCAAATA	RNQRSTAEAQMRATPADFKQKGARPMVDMEPAQIGQAVGNR	41	Faecalibacterium prausnitzii
AMP_142922_c7_g5_i2	AGCAAAGAAAATGAAAAAATTAGTTTTGATGGCCGTAGCTATCGTAGCAGTATCATTCGCATCATGTGGTAACAAAGCAGCTGACGCAGCAAAAGCAACTGCAGATTCTATCCGTATCGCTGACTCAATCGCAGCAGTAGAAGCAGCAGCTCTTGAAGCTGAACAAGCAGCAGCCGCAGCAGCAGATTCTTTGAATGCTGATAGCACTGCAACTGAAACTGTAGCTGAATAATTCAGAAACAGCTAGAGAGAATTGAAAGTCTGCCATGCGAAAGCATGCACAGACTTTTTTTATGATA	AKKMKKLVLMAVAIVAVSFASCGNKAADAAKATADSIRIADSIAAVEAAALEAEQAAAAAADSLNADSTATETVAE	76	Bacteroides
AMP_142969_c1_g1_i4	ATTCCTTTCGTGCAAAAGAGATTTACCCAAAGTACAAAAGAAACAGCTTACAGCAGATTTTTACACCAGATAAAAAAGACAGTTTCAGTAATGAAGCTGTCTTTTTCTATGATTAAGA	SFRAKEIYPKYKRNSLQQIFTPDKKDSFSNEAVFFYD	37	Blautia wexlerae
AMP_143018_c44_g10_i2	CGGCGGGCCTGGGCCTGCTGAAACGAAGAGAACCACATTGAAAGCCGCAGGTCGTAACCTGTAAAAGATTGAAAAATTCAGATGGTTGGTTCATAAATCAGATTCAGCAAGCCCAGGAGCCGTCAAGACAGACCCTGGCGTGTAATATAGATTAAGATGAAAGAAGGTCGGTAGCGATGACCGTCACCACTCCACCGAACAGGAAGAACCTGAATTTCATCTGATCCACAAGGAGACACTCCAATGTACTAGAGTTAAGAGTCTTTGGTCCTCGGCATCAGACCCATTACCCCAAGAACGATCTTAATAACGAACATTACTCCGTTCCACAAATGC	MKFRFFLFGGVVTVIATDLLSS	22	Oscillospiraceae
AMP_143020_c3_g1_i1	GGGGATGCAATGGTTTCGACGGGAGTCTTGAAAGTAGGAATAGCCATCCGCGGACCAGTGAACCGCGTCATCAAGCTGGAACCTTTTTTAAAAAGAAACGACAAAAATAATTTTGCACTGGCTGCCTAATTAACGGCGCCTGTCGGCCTTCGGTTTCTCACCGCTGAAGAATCCGGCATCGACTTGGTGGGGCACTTTTCTGCCTAAGCTTTGCGGCAGGGAAAGATTCATGAAGCTACTGAGGGGTAAAGCCTGTCAATCGGCGTTGCAACGAGGGAATGGAAAAAGACTGACTGTGATGGGAGAAGTTCTTATGGATGGGTTTTCGGACAGGGGTTCAATTCCCCTCATCTCCACCAA	GDAMVSTGVLKVGIAIRGPVNRVIKLEPFLKRNDKNNFALAA	42	Caudovirales
AMP_143036_c3_g1_i1	AACTACAATGGACTCACCCATATCTAAACTCCTCGAGCGCCGGATACGCATCACAGAGATGAATTTCATATTACCACATTCTTTCGAGTTAGATATGCGAAGGGAGTGTCATTACTTAGTACATCGTAGTTTCTCCTTTAGAGTTATTCAAATAAGACGCTCCGTACAAAAGTTTTCTTCATTTGGATCACCTTCGGATGATCTATTTGAACGCGAGGGATTTTATTTCACAGACTGTTCTGTTATTCGATTTATTGATGCTCAAGAACGGCTCTTGTTGTTGTGTTTTTATACGGGTGAAACATCGCGTTTGTGGTGAGCCTCTGTTTTGA	KTEAHHKRDVSPV	13	Faecalibacterium prausnitzii
AMP_143096_c2_g1_i1	AAAAAAAAAAAAAGGGCGTATATTTGTCATACGGAAAGAGATGAAAAGCGAGCCGCATTAGTTGGATTGGGAAACTCATCAAACTAATCTGAAAACCGAGACATAGCTTCATCTTCCAATGGCGGGCCACGCCTTCGGGTAGCATTTATGCCGGTGGATTACAAAGGAGGAGAGCACTCAAAACCTGTCATTCGGAGTTTCATCGCATCACTGGTGCGGCTTCATATGATTAAGATCGGAAGAGCGTCATGA	KKKKGVYLSYGKR	13	Phocaeicola
AMP_143156_c8_g1_i3	TAACTTTAAGGTATGCCCGGAGGCAGGTGCCTCCGGGCATACCATTACGAGGCATTATCATCCGGCGGCCTGAGAGCCGCTGAACGAAATACACTTCAGATTCTAGGGGTTACTGATTAGACACCAAGATTACCGGCTGCGTCGGTAATGCCGGAAACGGCGTCGTTGAAGCCGATCTTGGCAGGAGCGGTGCCCAGGGTGTAGACGACAGAAGCCATGCCCAGAGTACGCATGACCTTGTTGCCGAAGGTCATCTCGTCGCCATTGACATCACCGTAGATGTTCTTCTTCAGAGCGCCGTCGTCGCCGAAGATCTTATCGCCGTTGTCGCCGCCCCAGTTGCCGCCGAACATAACGCCCAGAGTGGAGTTGACGGTCTTCTGGAAGAAGGA	SFFQKTVNSTLGVMFGGNWGGDNGDKIFGDDGALKKNIYGDVNGDEMTFGNKVMRTLGMASVVYTLGTAPAKIGFNDAVSGITDAAGNLGV	91	Faecalibacterium prausnitzii
AMP_143169_c2_g1_i6	GGACCGGGGAAGGCGTCGTAAACGTGGCGTCCGTGAGGCGGGAAAGAGTTGACCTGCCCACGCATCATGACTCTACCAAACCGCAAAGTCTGTCAGGTGTCTTTGCGGAGCGGGAATTCTGAAACCTGACTGCGCTCGGAGAAAGTCCCGTGAAACTGTTTTCGGACAGGGGTTCAATTCCCCTCGGCTCCACCAATA	MMRGQVNSFPPHGRHVYDAFPG	22	Siphoviridae sp.
AMP_143457_c1_g1_i1	CCCGGGGGGCGTAAAGGCTTCGACGGGGATGCAGAAGTGCGGGCAGCGAGTAGGAGGCGGGACTCCTTCATCACCCCGAAATTAAAATTAAACGCTAACGATAATAGAGTAGCACTTGCTGCGTAACTAAACGCAGCCGTCTGACCGGACAGGACCACGGGTCCGGATCAGGCGTCGATTAGTGGTGAACGCCTTCAGCTTTTTCCTTGGGGCTGCTGGTGTATCAGAGGATACCGTAGCACATAGCCTGTTTGCCGGCGATGTGTGAGGGGAATCCCAAAAGACAAACTGCACTCGGAGATACCTGCGTGGAAGTGTTTTCGGACGGGGGTTCAATTCCCCCCGCCTCCACCAATATGTAAGAA	SYILVEAGGIEPPSENTSTQVSPSAVCLLGFPSHIAGKQAMCYGIL	46	Neisseriaceae
AMP_143683_c0_g1_i8	TGAGGTGCTCCTTTTCGATTATTCAATTCCATGTCTCCGTATCGGTTTCATCTGGATCACTCTCCGGCGGATCTATTTGAATTGCCATGGGATTTTATTCTCGACAGACTGTTCTGTTGTTCGCATTATTTGATGCTCAAGACCGGCTCTCGGTTTTGTGTTTTTATACGGGGGAAACATCCCGTTTGTGGTGAGCCTCTGTTTTGCTTCTCAGCGAACCCCGACAGCCTGTCACTGCTGTGCGGGTTCCATATCGACCTTCGGTCTCGCTCCTTTCTGCTTCAAGTCAGCGGGATTAGCTCTCTCTTGAGCTTCTGCTGTACTTCTCTGGTTTCT	RNQRSTAEAQERANPADLKQKGARPKVDMEPAQQ	34	Faecalibacterium prausnitzii
AMP_143985_c1_g7_i1	TTATAAAAAATGCACCTTCAATTCCTTTTGAAAGTGCATTTTTAGTGTTATTTAATTGTATTATTATTATAATTTTATATTTTGTATCGGAGATTATTCGCGATTCTACGTTCCTGTGAGACCTTTGTCGTCTGTTATTTTATCACCTGAATGATTTTCATATCCATTCAATACTTTATGTATTAAATCTTCTGTCAAGTCATTCCTGCTTTTATAACAAATCTGAGATTATAACATATCCTTTCAATGTTTCTTTACACATTTTTCATTCTATGTTATATGCGGTATTTTTATTCAATACATCTATGAGTGATTCATCTTTTTCTCTTTGCTTCCAGTTTCCGTACTCTCCGATCTTTGATCTTCTTTTCTTTCTACTGGACTTTTACGCTTGGCAAA…	QREKEISQRYLTKKAKVTDA	20	Ruminococcus torques
AMP_144063_c5_g2_i1	TGATCTCCGACTTAAACAGCCATCATATTCTTTCCTATGATGGCTGTTACATATTCAATTTTATCATATTTAATTTTTATATCGGAGAATGATTTTTAATTTTTATTCCCTGTCGCCTTTGTATGCTTTCCGATGATCTTTTACTCATCTTCTTTGCACATTCATTCAAATCTACTATTCATGTTTCTTTACACATATTAATAATATCTTTAAATATGTGGTATTCTGTTCAATATGTCTGCAGTTCTTTTTATCGTCCGGTGTATATTTTCTCCGTCTGTTCTATTCTTCCGAATCTCCTCTACCGGCCTTTTATCTATTATAATAAAGGCTTATTCTCTGGGAACTTCTACCTGCCATACCACTAACATATTGATTCGATGATTCTACTGTGTCCAT…	WGANPKEIQNKQKRIPDEKGNLEN	24	Dorea longicatena
AMP_144291_c5_g7_i1	GATTGGATCGGGAAACTCATCAATTTTTATGAAATACCGAGACAAGCTTCGCTTCTCAATGGCGGGCCACGCCCTTCGGGGTAACTCTTGAGTCGGTGGATTACAAAGAGGAGGAGCACTCAAATCATGTCATACGGAGTTTCATCACATCATCGGTGCGGCTTTCATGATTAAGATCGGAAGAGCA	CSSDLNHESRTDDVMKLRMT	20	Bacteroides
AMP_144384_c5_g1_i3	AGAAAAATATTAGCCGTATCGACTGGATCGGGAAACTCTTCAAATTAATCTGATATACCGAGAAAGCTTCGATCTTCAATGGCGGGCCACATCCTTCGGGACAGCTTTAAGCCGGTGGATTACAAAGGGGACGGGCACTCAAATCTTGTTCTATCAGAGTTTCATCACATCGTCGGTACGGCTTTTATTAGCCGTATCGACTGGATCGGGAAACTCTTCAAATTAATCTGATATACCGAGAA	MAGHILRDSFKPVDYKGDGHSNLVLSEFHHIVGTAFISRIDWIGKLFKLI	50	Bacteroides caccae
AMP_144415_c2_g1_i4	TTAGAAAAAGGAACGGTAGTCAACCAAGATTACCGTTCCTCTTTTATAGAAAGCCGCACCGATGATGTGATGAAACTCCGTATGACATGATTTGAGTGCTCCTCCTCTTTGTAATCCACCGACTCAAGAGTTACCCCGATGGGCGTGGCCCGCCATTGAGAAGCGAAGCTTGTCTCGGTATTTCATAAAAATTGATGAGTTTCCCGATCCAATCAATGCGGCTATTTTTTCTAT	LEKGTVVNQDYRSSFIESRTDDVMKLRMT	29	Bacteroides
AMP_144465_c6_g1_i3	AAGAAATTCATTCCCCTGCTGATCGTTCTTCATCGTTTCAAAGGAGAAGCTTCCATGAAACGTCCGGTACAGACCGAAAAATGAGGAAATCGAGGTCAAGAGGCTATGACTCCGAAGAAGTAAGCATCCTGCCGGCTGAGGGCTTGCAACCGCCTCAAGTCGGCAGGTTTTTTGTCTGATGTTTTCCAATGAAGCCTGCATCCTCCCGTTTTCCTGCCGGGAGGATGCGGGTTTTGTTTTGTCCCGGATATTA	KKFIPLLIVLHRFKGEASMKRPVQTEK	27	Faecalibacterium prausnitzii
AMP_144474_c1_g1_i1	GGAGCGAGACCGATGGTCGATATGGAACCCGCACAGTTCGGACAGACTGTCGGGATTCGCTGAGAGGCAAAACAGCGGCTCACCACAAACGGGATGTTTCCCACGTATTAAAACACTAAAACAGAGCCGGTCTTGAGCATCAAAAATGCGATAACACGACAAACTGTCGATTCAATTCTTCCCCAGAGCGTTCAGATAGATCCGCTTGAGATGATTCTTATGAAAGTATCAATGATCCGGAGAACCTTATTTGAATAGCTGTAAAGGAGTTCTACCAATGTACTAAGTAAGACGTTTCCCTTGCAAATCTAACTCGAAAGAATGTGGTAATATGAAATTCAACCTCAGGAACCGATTTAAGCAGTCCACCAGAGGAGAAAAGGGTCAATCCAAAGTACA…	MLKTGSVLVF	10	Faecalibacterium prausnitzii
AMP_144558_c2_g1_i2	AGGTTGATATGGAACCCGCACAGCAGGGACAGGCTGTCGGGGTTCGTTGAGAAGCAAAATAGAGGCTCACCACAAACGGGATGTTTCCCCCGTATAAAAACACAAAAACAGAGCCAGTCTTGAGCATCAAAAAAGCGATAACGCGACAACCTGTCGATTCAATTTTTCCCCAGAGCGTTCAGATAGATCCGCTGGAGATGATTCTTATGAAAGCATCAATGATCCGGAGAACCTTATTTGAATAGCTAAGAAGGAGTTCTACCAATGTACTAAGTAAGACGTTTCCCTTGCAAATCTAACTCGAAAGAATGTGGTATTATGAAATTCATCCTCATGAACCGTGTGCCGCAGTCCAGCAGTGGAGG	VDMEPAQQGQAVGVR	15	Faecalibacterium prausnitzii
AMP_144610_c1_g1_i1	GCAGGGACCGGGAGGCTACCGAAGGACTTGAAAGTAAGATGGCATAGCCGGCAGGATTCGTAAGGAAGGAGGCTCAAGTCCAATGGCTAAATTCAAAGATCCCATTCATCACCGGGGGGCCTGGGCCTGCTGAAAGCAAACGAACCTCATTAACAGACGCAGGTCATTACCTGTAAAAGATATAAAAGTTAAGATGCAAGGTTCGTAGCTTGCTTAAAATTCAGTGCTCAGGAAATCCCGTCAGAAAAAGTTCCCCGCCATT	RDREATEGLESKMA	14	Caudoviricetes sp.
AMP_144633_c0_g1_i1	AGAAACCAGAGAAGTACAGCAGAAGCTCAAGAGAGAGCTACTCCCGCAGACTTGAAGCAGAAAGGAGCGAGACCGATGGTCGATATGGAACCCGCACAGTTTGGACAGGCTGTCGTGATTCGCTGAGAGGCAAAACAGAGGCTCACCACAAACGGGATGTTTCCCCCGTATAATAACACAACAACAAGAGCCGTTCTTGAGCATCAATAAAGCGAATACAAGAACAG	RNQRSTAEAQERATPADLKQKGARPMVDMEPAQFGQAVVIR	41	Faecalibacterium prausnitzii
AMP_144643_c3_g1_i1	CAGACGTGTGCTCTTCCGATCTATAAAACAAAAGGGATTACGAAAAACAAAAAAGTAAAGGAGTGAGACCACCGAAAACATAATCTTTTCTTCATAATTTAAGAAAGCGAGGTACAGACCACCAGAATAGCAAAGTTTCAAATTCAAAGTCGG	QTCALPIYKTKGITKNKKVKE	21	Uncultured human fecal virus clone
AMP_144672_c0_g1_i1	GCGAATTACAGAACAGTCTGTGAAATAAAATCCCTCGCTTTCAAATAGATCCGCCGAAGGTGATCCCTATGAAGAAAGCTTTTGTACGGAACGTCTTATTTGAATAACTCCAAAGGAGAAACTCCGATGTACTAAGTAATGACACTCACTTCGCAAATCTAACTCGAAAGAATGTGGTAATATGAAATTCATGTCTGTGATTCGTATGCCGCACCCCAACGGTTAAGAAAAG	FLNRWGAAYESQT	13	Faecalibacterium prausnitzii
AMP_144673_c2_g1_i6	TTTAATCATTGAAAATGAGGTTGTGCCAATGTCTTGACACAACCTCACTAAAGATGCTATTGGGCGTTTAATGCAGCTAATGCTGCTTCTAAAGCTTCTTTAGACATGCCACTCAATATCTGTGCTTGACTTGAATGTTTCAGTTCTGTACAGTTCTTAATCCATTCACTGTAAACTGCTATTCTTGCATCTCACCTTGAAACAAGGTCGGAAGCTGTTGCTGCCTCTTTATACCACATTCCATAA	YGMWYKEAATASDLVSR	17	Bacteroides
AMP_144690_c1_g2_i6	ACTACAACAGTTAAGAAAAGGGTCATTCCAATGTACTAAGATATTCATTCCCCTGCTGATCGTTCTTCACCGTTTCAAAGGAGAATCTTCTATGAAACGTCCGGTACAGACCGAAAAATGAAGAATTCGAGGTCAAGAGGCTATGACTCCGAAGAAGTAAGCATCCTGCCGACAGAGGGCTTGCAACCGCCTCGTGTCGGCAGGTTTTTA	LQQLRKGSFQCTKIFIPLLIVLHRFKGESSMKRPVQTEK	39	Faecalibacterium prausnitzii
AMP_144720_c1_g1_i6	TTTCTCTTAACTGATGGAGTGCGGCACCGATATTCTAAAGATGAATTTCATATTACCACATTCTTTCGAGTTAGATTCGCCAGGGGCAAACTACATAGTACATTGGTAGAACTCCTTTTTTGCTATTCAAAAAATGTTCTCCGTACAAAAGATACCTTCATAGGAATCATCTCAGGCGGATCTATT	IDPPEMIPMKVSFVRRTFFE	20	Faecalibacterium prausnitzii
AMP_144747_c1_g1_i4	GCTGGGGGACAAGCTTATCGACAGGTAGTCGTGTAATCGCATTTTTGATGCTCAAGACTGGCTCATTTTTGTCGTGTTTTTATACGGGGGAAACATCCCGTTTGTGGTGAGCCTCTATTTCGCGTCTCAGCGAACCCCGACAGCCTGTCCCTGCTGTGCGGGTTCCATATCAACCATCGGTCTTCGCTCCTTTCTTCTTATAGTCAGCGGGAGTAACTCTCTTTTGAGCTTCTGCTGTACTTCTCTGGTT	NQRSTAEAQKRVTPADYKKKGAKTDG	26	Faecalibacterium prausnitzii
AMP_144754_c1_g1_i1	ATGAATTTCATATTACCACATTCTTTCGAGTTAGATTTGCGAAGGTAGTGTCATTACTTAGTACATGGGAGATTTTGGTTTGGAGTTATTCAAATAAGACGTTCCGTACAAAAGCTTTCTTCAATGGGATCACCTTCGGCGGATCTATTTGAACGCGAGGGATTTATTTCACAGACTGTACTGTTATCCGCTTTATTGAATGCTCAAGAACGGCTCTCGTTGTTGTGTTTTTATACGGGGGAAACATCCCGTTTGTGGTGAGCCTCTGTTTTGCTTCTCAGCGAATCCCGACAGTCTGTCCGAACTGTGCGGGTTCCATATCAACCATCGGTCTCGCTCCTTTCTGCT	MGDFGLELFK	10	Faecalibacterium prausnitzii
AMP_144771_c2_g7_i2	GGACGGGAGTGAGGACTTGAGACGTTTCCTGATCGGTACTGTGATTTGCTGTTCAGTGCATTTTAAGCATGCTACGATCCTTGCATCTTAACTTTTATATCTTTTTCAGGTAATGACCTGCGGCTGTTAATGAGGTTCGTTTGCTTTCAGCAGGCCCAGGCCCGCCGGTGATGAATGGGATCTTTGAAATTAGCCATTGGACTTGAGCCTCCTTCCTTACGAATCCTGCCGGCTTTGCCATCTTACTTTCAAGTCCTTCGGTAGCCTCCCGGTCCCTGCTTTCCCGGAGTTCTTCAAGTGTTCCCATTTAGACCTCTTACTGGAAGCCTTTGCGAAATCTGCTTGAAGCTGTCGGGAAAACCGCCGTGCCTTGTTCCGATGCTATTGAAAGTGGCTTTT…	MGTLEELRESRDREATEGLESKMAKPAGFVRKEAQVQWLISKIPFITGGPGPAESKRTSLTAAGHYLKKI	70	Siphoviridae sp.
AMP_144811_c2_g1_i1	GAAACACAGAGATGAATTTCATATTACCACATTCTTTCGTGTTAGATTCGCTATGGGCAAACTACTTAGTACATTGGTATAACTCCTTTTTTGCTATTCAAATAACTGTCTCCGTACAAAAGATACCTTCATCGGTGATCACCTTCGGCGGATCTATTTGAATTGCCGGGGGTCTAGGTTTATCGACAGGTTGTCGTTATATCGCAATGTTGATGCTCAAGAACGGCTCGTATTTGTTGTGTTTTTATACGGGGGAAACATCCCGTTTGTGGTGAGCCTCTGTTTTGCTTCTCAGCGAACCCCGACAGCCTGTCCCTGCTGTGCGGGTTCCATATCGACCATCGGTCTCGCTCCTTTCTG	QKGARPMVDMEPAQQGQAVGVR	22	Faecalibacterium prausnitzii
AMP_144811_c2_g1_i2	GGGGATAGGGGATGGAATCAAGGGGAACGATTTACACTAGAACATTGGAATGACCCTTTTCTTAACTGTTGGAGTGCGGGATACGAAACACAGAGATGAATTTCATATTACCACATTCTTTCGAGTTAGATTTGCTGGGGCATCTTGACTAGTACATTGGTAGAACTCCTTTTTTGCTATTCAAATAACTGTCTCCGTACAAAAGATACCTTCATCGGTGATCACCTTCGGCGGATCTATTTGAATTGCCGGGGGTCTGGGTTTATCGACAGGTTGTCGTTATATCGCAATGTTGACGCTCAAGACTGGCTCGTATTTGTTGTGTTTTTATACGGGGGAAACATCCCGTTTGTGGTGAGCCTCTGTTTTGCTTCTCAGCGAACCCCGACAGCCTGTCCC…	QKGARPMVDMEPAQQGQAVGVR	22	Faecalibacterium prausnitzii
AMP_144823_c1_g2_i1	ATAATGCGATAACACGACATCCTGTGGATTCATTTCTTCCCCAGAGCGTTCAGATAGATCCGCTGGAGATGATTCTTATGAAAGTATCAATGATCCGGAGAACCTTATTTGAATAGCGGAAAAGGAGTTCTACCAATGTACTAAGTAAGACGTTTCCCTTGCAAATCTAACTCGAAAGAATGTGGTAATATGAAATTCATCCACATGAACCGTTTGCCGCAGTCCAACAGTTGAGAAAAGGGTCTGTCCAATGTACAGTTGATTTTCATCCCCTTGCAAAGCACCTAAATTATGAAGAAACGTTTCTAAGGAGAGTCACCCTATGAAACCCGTATTACGAAAATGAGGTCACCAAGGAGAAGAGGCTTATGACTCCGAA	MKFIHMNRLPQSNS	14	Faecalibacterium prausnitzii
AMP_144825_c5_g1_i5	GTTTTGGAGTGCGGCATCCTGCCTTTTATCATTTGAAAGAAAAATCTTATTTTTTATTTGCAATTTGTTCAAAATCCCCACAAAGAAACTCCATTTTTATCCGGTACAATAAAGGTGCAGTCGGGAAGACAAGAACGAGATCCCCCATCTCCGGCTTTTGACTTTCCATAAATGCCATGCAGGCAGGATTCATGCGCAGCCCCGCAGCGGGTGCCGCGCCCTTAAAAAAATACTGTCCCCCACCTATGCGAGGCAATAGCCACGGCGGCGGACAGACTAATATATGTATATGTA	VLECGILPFII	11	Faecalibacterium prausnitzii
AMP_144971_c2_g1_i1	GCTGACTCAGTGGCATTCGGGTTGCGCGATCGGCGACGGCGCGCCTCGGAACTGAACGGGGAACCGCCTCCATCGGCAACGAGAGGTGTTCCGTGGGGAAAACAAACCCGCACCTAAGCCGCAAGATTTACCTGGTTTGCTGCCGCTGACTTAGCATATCTATATGTAAGATCGGAAGAATATGTAAGA	LTYSSDLTYRYAKSAAANQVNLAA	24	Pusillimonas faecalis
AMP_144974_c2_g2_i18	CTCCAATGTACTAGTAATGACGCACCCTTCGCAAATCTAACTCGAAAGAATGTGGTAATATGAAATTCATCTCTGTGATTCGTATCCCGCACTCAAACAGTTAAGAAAAGGGTCATTCCAATGTACTAAGAAATTCATTCCCCTGCTGATCGTTCTTCATCGTTTCAAAGGAGAAGCTTCCATGAATCGTCCGGTACAGACCGAAAAATG	FFGLYRTIHGSFSFETMKNDQQGNEFLSTLE	31	Faecalibacterium prausnitzii
AMP_145050_c1_g1_i3	GAGCTAATCCCGCTGACTTGAAGCAGAAAGGAGCGAGACCGATGGTTGATATGGAACCCGCACTGCAGGGACAGGCTGTCGGGATTCGCTGAGAAGCAAAATAGAGGCTCACCACAGACGGGATGTTTCCCCCGTATAAAAACACAACATAAATGAGCCAGTCTTGAGCATCAAAAATGCGATTACACGACTACCTGTCGATAAACTTAACCCCCAGCGATTCAAATAGATCCGCAGGAGATGATTCCTATGAAGGTATCTTTTGTACGGAGAACATTATTTGAATAGCAAAAAAGGAGTTCTACCAATGTACTAAGTAGTTTGCCCATAAATA	ANPADLKQKGARPMVDMEPALQGQAVGIR	29	Faecalibacterium prausnitzii
AMP_145141_c0_g1_i13	AAACCAGAGAAGTACATCAGAAGCTCAAGAGAGAGCTACTCCAGCTGACTTGAAGCAGAAAGGAGCGAGACCGATGGTCGATATGGATCCCGCACAGTTTGGACAGGCTGTCGGGATTCGCTGAGAGGCAAAACAGAGGCTCACCACAAACGGGATGTTTCCACCGAATAAAAACACAACAAAAAAGAGCCAGTCTTGAGCAACAAAAATGCGATTACACGACAACCTGTCGAATAACTAAAACCCCCGCGATTCAAATAGATCCGCCGGAGATGATTCCTATGAAGGTATCTTATGTACGGAGAGCAT	NQRSTSEAQERATPADLKQKGARPMVDMDPAQFGQAVGIR	40	Faecalibacterium prausnitzii
AMP_145245_c6_g1_i2	CTGTACCTCGCTTTCTTAAATTACGAAAAACAAAAAAGTAAAGGAGTGAGACCACCGAAAACATAATCTTTTCTTCATAATTTAAGAAAGCGAGGTACAGACCACCAGAATAGCAAAGTTTCAAATTCATGACTTATAAGAAAGGCAGGTACGGACCACCAAGAACTTAAGCTTTTAAATCCAACTAAGTTTTATAAGTAGTTCCTATCAAACAAGGAAGGTACAGTCCAATGGAAACCTAACGATTTATCTTATTTTGAACGTAACTGTTAAACATTCTAAAGAAGGTACGATCCAATGGAAATTTAATGATTTACCTTATTTTTAAAGTGACATTCAATCAAAATAAGGAAGGTACAGTCCAATGAAACGTTAACGATTTACCCTATTATAAAACGT…	LNKRATDLYFIVAPVKILYPRDDTSLSVK	29	Uncultured human fecal virus clone
AMP_145245_c6_g1_i5	CTGTACCTCGCTTTCTTAAATTACGAAAAACAAAAAAGTAAAGGAGTGAGACCACCGAAAACATAATCTTTTCTTCATAATTTAAGAAAGCGAGGTACAGACCACCAGAATAGCAAAGTTTCAAATTCATGACTTATAAGAAAGGCAGGTACGGACCACCAAGAACTTAAGCTTTTAAATCCAACTAAGTTTTATAAGTAGTTCCTATCAAACAAGGAAGGTACAGTCCAATGGAAACCTAACGATTTATCTTATTTTGAACGTAACTGTTAAACATTCTAAAGAAGGTACGATCCAATGGAAATTTAATGATTTACCTTATTTTTAAAGTGACATTCAATCAAAATAAGGAAGGTACAGTCCAATGAAACGTTAACGATTTACCCTATTATAAAACGT…	LNKRATDLYFIVAPVKILYPRDDTSLSVK	29	Uncultured human fecal virus clone
AMP_145252_c3_g1_i1	GAAGAACGTAATCGTGCAGAAATGCATAGAACTTATGGAATGTGGTATAAAGAGGGAGCAACAGCTTCCGACCTAGTTTCTTGGTGTGATGCAAGAATAGCAGTTTACAGTGATTGGATTAAGAACTGTACAGAACTGAAACATTCAAGTCAAGCTCAGTTATTGAGTGGCATGTCTAAAGAAGCTTTAGAAGCAGCTTTAGCTGCATTAAACGCCCAATAGCAACTTTCGTGAGGTTGTGTCAAGACATTGGCACAACCTCATTTTCAATA	EERNRAEMHRTYGMWYKEGATASDLVSWCDARIAVYSDWIKNCTELKHSSQAQLLSGMSKEALEAALAALNAQ	73	Bacteroides
AMP_145261_c61_g1_i4	AGAGGCTCACCACAAACGGGATGTTTCCCCCGTATAAAAACACAAAAACAGAGCCGGTCTTGAGCATCAAAAATGCGATAACACGACAACCTGTCGATTCAATTCTTCCCCAGAGCGTTCAGATAGATCCGCTGGAGATGATTCTTATGAAAGTATCAATGATCCGGAGAACCTTATTTGAATAGCTGAAAAGGAGTTCTACCAATGTACTAAGTAAGACGCTTCCCTTGCAAATCTAACTCGAAAGAATGTGGTAATATGAAATTCATCCTCATGAACCGTTTGCCGCAGTCCAACAGTTGAGAAAAGGGTCAGTCCAATGTACAGTTGATTTTCATCCCCTTG	MLKTGSVFVFLYGGNIPFVVSL	22	Faecalibacterium prausnitzii
AMP_145264_c2_g1_i1	GGAATCCCTGGCAAATCTAACTCGAAAGAATGTGGTAATATGAAATTCATCTTCAGAATCTCGGTGCCGCACTCCATCAGTTAAGAGAAGGGTCAGTCCAATGTACAAAGTAAATTCGTCCCCTTGAAATAGATTCTCAGTTTCCAGTAGTTTCTAAGGAGAGTCACTCTATGAAACGTTTACTCCGAAAATGAGGAACCCCAAGGAGAAGAGGCTTATGACTCCGAAGAAGTAAGT	TYFFGVISLFSLGFLIFGVNVS	22	Faecalibacterium prausnitzii
AMP_145291_c1_g1_i10	ATTTTTAGAAAGACCGATGAACAAAGGACGCTAGTGTGGCGTTTTATTGATGCAAATAACCTGAAACCCCTCTTGGATATGTGAATAACTGATTGGCGGTAGTTATGTTACTCAAAACATAGAGCAGTCTAAAAAATTGCATAGTAGTTTTGTCGTGTTTTATTTTGTGTTTGTGTTGTGGCTGTTCTCCGACTTGAGTCGGGGGACAGTTTTTATGATTAAGA	FLERPMNKGR	10	Phocaeicola
AMP_145297_c11_g1_i1	AAATTCAGGTTCAAAACCTGGTACGCAAAAGCCTAAATAGAAACCCCCAATCACCGGTGATTGAAATGAAAGATCTTACTCCGCCGAACAAATAATGCTTCCCCTGATCTGGCTGGTGCAAGCGCAGCGCCCCCCAAAAGGAGAACCTCCGATGTACTAGAGCAAAGAGGTATCAACCTCTGGCATCAAATTCAGCTACCCTGCACAAAATTATTGAAGCTCACTTCCCCGTTCCACAGATGCACCAAGAATCGTATTCCTTGCAAAATGTTTCCAGGCA	AWKHFARNTILGASVERGSELQ	22	Caudoviricetes sp
AMP_145304_c3_g1_i2	GTTCTTATACTTTAAAACCTGCACTCTCCCGGCGGGAGGATGCAGGCTTCATTGGAAAACATCAGACAAAAAAACCTGCCGACTCGAGGCGGTTGCAAGCCCTCAGTTGGCAGGATGCTTACTTCTTCGGAGTCATAGCCTCTTGTCCTCGATTTCTTCATTTTTCGGTCTGTACCGGACGTTTCATGGAAGCTTCTCCTTTGAAACGATGAAGG	LHRFKGEASMKRPVQTEK	18	Faecalibacterium prausnitzii
AMP_145373_c0_g1_i2	GGGCGGCGTCTCCATGGAAAGTGAAACAGAAATATACCGCATCGTCTGGCGTGAACAGAATCTGGTAAGGGTGGAAGGGCAGTGTAAGAGACTACCGCCTTTCTGGTAACAGGAGGTGCATATGTAAACCCCATTCGAAGCAAGACCGAACAAAAGCGTTGTCGTGGCCCGCCAGCTTTAGGTAGGTCGCTTGAGACGCTTGGCAACAATCGTACTAGATAGATGATCACCCAACGCCATAACCCGGCTTATCGTCCTTCTTCTTAAGATGTTTATATGTA	TYKHLKKKDDKPGYGVG	17	Lachnospiraceae
AMP_145389_c1_g1_i12	GGGGGTTCGCTGAGAAGCAAAACAGAGGCTCACCACAAACGGGAAGTTTCCCCCGTATAAAAACACAACAACGAGAGCCGGTCTTGAGCATTCAATAATGCGGATAACAGTACAGTCTGTGAAATAAATCCCTCGCGTTCAAATAGATCCGCCGAAGGAGATTCGAAATGAAGAAAGCTTTTGTACGGAGCATCGTATTTGAATAACTCCAAAGGAGAAACTCCAATGTACTAGTAATGACGCACCCTTCGCAAATCTAACTCGAAAGAATGTGGTAATATGAAATTCATCTCTGTGATTCGTATCCCGGACTCCATCAGTTAAGAAAAGG	MKKAFVRSIVFE	12	Faecalibacterium prausnitzii
AMP_145422_c2_g1_i12	CTTCATTTTTCGGTCTGTACCGGACGTTTCATAGAAGATTCTCCTTTGAAACGGTGAAGAACGATCAGCAGGGAAATGAATTTCTTAGTACATTGGAATGACCCTTTTCTTAACTGTTGGAGTGCGGGATACGTATCACAGAGATGAATTTCATATTACCACATTCTTTCGAGTTAGATTTGCGAAGGGAGTGTCATTTCTTAGTACATCGGTGTTTCTCCTTTGGAGTTATTC	SFFGLYRTFHRRFSFETVKNDQQGNEFLSTLE	32	Faecalibacterium prausnitzii
AMP_145457_c2_g1_i4	TTATAAAACTTAGTTGGATTTAAAAGCTTAAGTTCTTGGTGGACCGTACCTGCCTTTCTTATAAGTCATGAATTTGAAACTTTGCTATTCTGGTGGTCTGTACCTCGCTTTCTTAAATAATGAAGAAAAGATTATGTTTTCGGTGGTCTCACTCCTTTACTTTTTTGTTTTTCGTAATCCCTTTTGTTTTAT	KTKGITKNKKVKE	13	Uncultured human fecal virus clone
AMP_145458_c4_g1_i1	CAATAAAGCGGATAACAGTACAGTCTGTGAAATAAATCCCTCGCGTTCAAATAGATCCGCCGAAGGTGATTCGAAATGAAGAAAGCTTTTGTACGGAGCATCGTATTTGAATAACTCCAAAGGAGAAACTCCAATGTACTAGTAATGACGCTCCCTTCGCAAATCTAACTCGAAAGAATGTGGTAATATGAAATTCATCTCTGTGATTCGTATCCCGCACTCCAACAGTTAAGAAAAGGGTCATTCCAATGTACTAAGAAATTCATTCCCCTCCTCAACGTACATCAG	MKKAFVRSIVFE	12	Faecalibacterium prausnitzii
AMP_145477_c0_g1_i4	GTCGATATGGAACCCGCACAGTTTGGACAGGCTGTCGGGATTCGCTGAGAGGCAAAACAGAGGCTCACCACAAACGGGATGTTTCCCCCGTAAAAAAACACAACAAAAATGAGCCAGTCTTGAGCATCAAAAATGCGATTATACGACAACCTGTCGATCAACTAAAACCCCCGCGATTCAAATAGAT	VDMEPAQFGQAVGIR	15	Faecalibacterium prausnitzii
AMP_145502_c1_g1_i5	AGCAGAAAGGAGCGAGACCGATGGTTGATATGGAACCCGCACAGTTCGGACAGACTGTCGGGATTCGCTGAGAAGCAAAACAGAGGCTCTCCACAAACGGGATGTTTCCCCCGTATAACTAAACAAATCAAAGAGCCGGTCTTGAGCATCAAAAATGCGAAAACAGTACAGTCTGTCAGAATAAATTCCCTGGCAATTCAAATAGATCCGCCCGAGGTGATCTCCCATGATGAGGACAGTTACACGGATGCACCTGTTTGAATGACCATAAAGGAGTAACTCCAATGTACTAAGCAATGGAATCACAGGCAAATCTAACTCGAAAGAATGTGGTAATATGAAATTCATCTTCAGAATCTCGGTACCGCAGTCCTAGAGTTA	QKGARPMVDMEPAQFGQTVGIR	22	Faecalibacterium prausnitzii
AMP_145548_c1_g1_i5	AACACGACAACCTGTCGATAAACTTAACCCCCAGCGATTCAAATAGTTCCGCCGGAGATGATTCCTATGAAGGTATCTTTTGTACGGAGAGCATTATATGAATAGCAAAAAGGAGTTCTACCAATGTACTTAGTAACTTGTCCCTGGCAAATCTAACTCGAAAGAATGTGGTAATATGAAATACATCTCTG	MIPMKVSFVRRALYE	15	Faecalibacterium prausnitzii
AMP_145655_c4_g1_i2	TTTTTTAATCTGTTACATAGTTTCATATATACTCGCCAAGAGTATAAGATGAAGAATCAGATCAGAAAAGGGTAACAAGAATAATTGTTATTTGAAGGTTAGAAAGTTTTTAAAAAGCAACTATACATTTTAGTTATGAGCGTTTTGTAAGTGGAGTGTGTAGAGAACAATTTTTAAAATTGATAATTTATAATAATAAGAGAAAATTGATATCTGACTTCTGAACAGAAAAAAGTATAAGAGAAAAAGAATATCCGGATAAAATTTTGGAACGAGAACGAAAGGAAGGAGGCTTTGACCGTTGGATATTTCATCATCTAAAACTCAATATGTTAATGGTATGGCAAATGTAAATTCCTGTGAGATGAGCCTTAACCATAGATTATAATCCGGTAAGAG…	MIKKVGVVDKPEAIIRYKKIQHLLTY	26	Coprococcus comes
AMP_145717_c0_g1_i3	GTTAGAAACGATGCAGGTTAAGCTTTGTCCCTGCAGGCGTATCATGAAGCTACTGAATGGATCAGGGTGTCTGCTACCGGATTCAGGAGGGAACGTGCCGGAGCAAGACCGGCGGCAAATAGACAGACTATGATAGTAGAAGGACATGGAATGGGCTTTTGGACACGGGTTCGACTCCCGTCTAGTCCACCAATA	MDQGVCYRIQEGTCRSKTGGK	21	Lachnospiraceae
AMP_145741_c0_g1_i2	TTCGAGTTAGATTTGCAAGGGAAACGTCTTACTTAGTACATTGGAAGAACTCCTTTTCAGCTATTCAAATAAGGTTCTCCGGATCATTGATACTTTCATAAGAATCATCTCCAGCGGATCTATCTGAACGCTCTGGGGAAGAATTTAATCGACAGGTTGTCGTGTTATCGCATTTTTGATGCTCAAGACCGGCTCTGTTTTTGTGTTTTTATACGGGGGAAACATCCCGTTTGTGGTGAGCCTCTATATTGCTTCTCAGCGAACCCCGACAGCCTGTCCCTGCTGTGCGGGTTCCATATCAACCATCGGTCTCGCTCCTTTCTGCTTC	KQKGARPMVDMEPAQQGQAVGVR	23	Faecalibacterium prausnitzii
AMP_145774_c5_g2_i5	GATATCCCATGATTTTGAAAGTTACACGGATGCTCCTGTTTGAATGACCAAAAAGTAGTAACTACAATGTACTATGCAATTGAAACCCTGGGAAATCTATCTCGAAAGAATGTGGTAATATGAAATTCATCTTCTGAATCTCGGTACCGCAGTCCAACAGTTTAGAGAAGGGTCAGTCCTTTGTACTAGAGTAGTTCATCCCCTTTAATAAAACTCTTCTGTTTCAGGTAGTTTCTAAGGAGAGTCACCCTATGAAACGCATACTCCGAAAAAGAGAGAACCCAAGGAGAAGAGGCTTATGACTCCGAAGAAGTACGTATCCAGCCGGACGAGGGCTTGCAAACGCCTCGTCCGGCTGGTTTTATAA	ISHDFESYTDAPV	13	Faecalibacterium prausnitzii
AMP_145839_c0_g1_i20	CCGGCTTAAAGCTGTCCCGAAGGTTGTGGCCCGCCATTGAAGAACGAAGCTTTCTCGGTTCATCAGATTAATTTGAAGAGTTTCCCGATACAGTCGATACGGCTAATAAAAAGCCGCATCGACGATGTGATGAAACTCTGATAGAACAAGATTTGAGCGCTCGCCCTCTTTGTAATCCACCGGCTTAAAGCTGTCCCGAAGGTTGTGGCCCGCCATTGAAGAACGAAGCTTTCTCG	RKLRSSMAGHNLRDSFKPVDYKEGERSNLVLSEFHHIVDAAFY	43	Bacteroides
AMP_145854_c3_g1_i2	GTTTAGACGTGTGCTTATCCGTTCTCATGTACGGCTCTTGTTGTTGTGTTTTTATACGGGGGAAACATCCCGTTTGTGGTGAGCCTCTGTTTTGCTTCTCAGCGAACCCCGACAGTCTGTGCGTACTGTGCGGGTTCCATATCGACCATCGGTCTTCGCTCCTTTCTGCTTAAAGTCAGCGGGGTTAGCTCTCACTTGAGCTTCTGCTGTACTTCTCTGGTTTCT	ETREVQQKLK	10	Faecalibacterium prausnitzii
AMP_151468_c5_g1_i1	GGAGGGAGCGTCATTACTAGTACATTGGAGTTTCTCCTTTGGAGTTATTCAAATACGATGCTCCGTACAAAAGCTTTCTTCATTTCGAATCACCTTCGGCGGATCTATTTGAACGCGAGGGATTTATTTCACAGACTGTACTGTTATCCGCTTTATTGAATGCTCAAGACCGGCTCTCGTTGTTGTGTTTTTATACGGGGGAAACATCCCGTTTGTGGTGAGCCTCTGTTTTGCTTCTCAGCGAACCCCGACAGTCTGTGCACACTGTGCGGGTTCCATATCAACCATCGGTCTTCGCTCCTTTCTTCTTAAAGTCAGCGGGGTGAGTTCTCATTTGAACGCGAGGGATTTATTT	MKKAFVRSIVFE	12	Faecalibacterium prausnitzii
AMP_385865_c1_g1_i1	GCGGGGGGTTAAGTTTTTCGACTGGTTGTCGTGTAATCGCATTTTTGATGCTCAAGACTGGCTCATTTTTGTTGTGTTTTTATACGGGGGAAACATCCCGTCTGTGGTGAGCCTCTATTTTGCTTCTCAGCGAATCCCGACAGCCTGTCCCTGCTGTGCGGGTTCCATATCGACCATCGGTCTCGCTCCTTTCTGCTTCAAGTCAG	DLKQKGARPMVDMEPAQQGQAVGIR	25	Faecalibacterium prausnitzii
AMP_391824_c1_g1_i1	ATCACATCATCGGTGCGGCTTTTGGAGCCGCATCGGTTAGATTGGGATACTCATCAATTTATTTCAGAAAACCGAGAATGCTTCGCTCACTAATGGCGGGCCACGCCTTCGGGTAGCTTAATTGCCGGTGGATTACAAAGGTGACGGGCGCTCAAATCTTGTTAGCTCGGAGTTTTCATCACATCATCGGTGCGGCTTTTAATATGTAAGATCGGAAATA	FPILHIKSRTDDVMKTPS	18	Paraprevotella
AMP_60060_c0_g9_i1	TTTTTCTTTCAATGCCGCCTTTTAAACTATTTCGTCCATGGGACTATACCTCGCTATTCTTTTTTCTACTGTTCGTTCTGTTTGCCGCTTCATTTTGAAATTTCTAAACAATTTTTCTTATTGCCTATCATTTCTTTTATGAAACTCTCAAACAACTCTTTTGGACTTCTTCGCTTTTCTCTTCAATCTCTGAACCTGTTTTCTTATGACATTTGGAATTGTATCATATAAGAATGTTTCTGATCTGATACTAATTCAGGATTCCTTTCTTAGGATCGTCATGTTTTCATTTCATCTTTTGAAGGTAAAACCGAATGCAATTACTGTTTTGGTGGACTGTACCTCGATTCTTTTAAAATTCTTTTGGGTAAATCGTTATGTTTCTGGCGGTCCGTACCT…	AGNKKQERKK	10	Roseburia intestinalis
AMP_612198_c2_g1_i1	ATATACAAAAGAGAAAATCATCGAATTGCCAAAGAGAAAAAAATTTATATCACCAAGGATAAAAACTCAGAAATACTCCAAAATACAAAAGATAAAATACATGAACTAAATACACCTGATAAATAGTCAAAATACAAAAGTATCGAGGCATTCCTTTCGTGCAAAAGAGATTTACCCAAAGTACAAAAGAAACAGCTTACAGCAGATTTTTACACCAGATAAAAAAGACAGTTTCAGTAATGAAGCTGTCTTTTTCTATGATTAAGATCGGAAGAGCG	IYKRENHRIAKEKKIYITKDKNSEILQNTKDKIHELNTPDK	41	Blautia wexlerae
AMP_92149_c2_g3_i1	TAAGCCTCTTCTCCTTGGGGTTCTTCATTTTCGGAGTAAACGTTTCATAGGGTGACTCTCCTTAGAAACTACTGGAAACTGAGAATCTATTTCAAGGGGACGAATTTACTTAGTACATTGGACTGACCCTTCTCTTAACTGATGGAGTGCGGCACCGAGATTCTGAAGATGAATTTC	MECGTEILKMNF	12	Faecalibacterium prausnitzii

## Sheet: suppl_table_4
# Supplementary table 4: Characteristics overexpressed AMPs
AMP	Overexpressed group	Putative origin	Size in amino acids	Tools confirmed is an AMP	Average identiy with homologus peptides	Homology with best-hit DNA (% coverage, % identity)	Best-hit description	Hydrophobicity	Net Charge
AMP 3020	O	Phage	42	2	0.7679	99% cov, 99.16% ident	Caudoviricetes sp. isolate ctJ1L4	0.15	3.76113
AMP 8681	OMS	Phage	33	3	0.9293	93% cov, 99.71% ident	Caudoviricetes sp. isolate ctlNO7	-0.751515	6.74897
AMP 5245	OMS	Phage	29	1	1	96% cov, 99.51% ident	Human fecal virus	-0.0103448	1.75845
AMP 8200	O	Plasmid	72	1	0.9585	100% cov, 100% ident	Bacteroides dorei plasmid	-0.413889	6.47145
AMP 3076	OMS	Bacteria	26	1	1	96% cov, 99.73% ident	Escherichia coli	-0.823077	-0.322263
AMP 2526	OMS	Bacteria	12	1	0.9375	100% cov, 92.45% ident	Romboutsia ilealis	0.4	1.75611
AMP 3096	OMS	Bacteria	13	2	0.9318	86% cov, 100% ident	Phocaeicola dorei	-1.55385	5.7531
AMP 5865	O	Bacteria	25	1	0.92	99% cov, 99.01% ident	Faecalibacterium spp.	-0.792	0.763136
AMP 2198	OMS	Bacteria	41	1	0.9667	92% cov, 99.61% ident	Blautia wexlerae	-1.54146	3.93805

## Sheet: suppl_table_5
# Supplementary table 5: Prevalence of AMPs in other metatranscriptomes
AMP	Prevalence (%)
AMP_3076	39.42
AMP_2526	38.62
AMP_3096	98.41
AMP_5865	85.71
AMP_2198	89.95
AMP_8200	9.79
AMP_3020	75.4
AMP_8681	80.16
AMP_5245	93.92
